# Supplementary material
Source: PubMed Central journal article supplement (PMC8427495)
Supplement: jamasurg-e214287-s003.pdf [file jamasurg-e214287-s003.pdf]

## Data Sharing Statement

Zhu. Patient-Centered Decision-making for Postoperative Narcotic-Free Endocrine Surgery. *JAMA Surg*. Published September 08, 2021. doi:10.1001/jamasurg.2021.4287

### Data

**Data available:** No

### Additional Information

**Explanation for why data not available:** The dataset generated during the current study is not publicly available due to privacy concerns.
